# Supplementary material for: Insight into the potential application of CuOx/CeO2 catalysts for NO removal by CO: a perspective from the morphology and crystal-plane of CeO2
Source: Royal Society of Chemistry journal article supplement (doi:10.1039/d2nj03542a), 2022-01-01
Supplement: d2nj03542a1.pdf [file d2nj03542a1.pdf]

1

## Supplementary files

2 Insight into the potential application of CuO<sub>x</sub>/CeO<sub>2</sub> catalyst for NO removal by CO:

3 perspective from the morphology & crystal-plane of CeO<sub>2</sub>

4 Yali Du <sup>a,1</sup>, Dong Lu <sup>b,1</sup>, Jiangning Liu <sup>b</sup>, Xiaodong Li <sup>a</sup>, Chaohui Wu <sup>b</sup>, Xu Wu <sup>b,\*</sup>, Xia An

5

6 <sup>a</sup> College of Chemistry and Chemical Engineering, Jinzhong University, Jinzhong 030619, China.

7 <sup>b</sup> College of Chemistry and Chemical Engineering, Taiyuan University of Technology, Taiyuan

8 030024, China.

9

10 <sup>1</sup> These authors contributed equally to this work.

11 **Corresponding Authors**

12 \* E-mail: wuxu@tyut.edu.cn (Xu Wu)

13

## 1 **1 Experimental section**

### 2 **1.1 Details of catalytic performance evaluation**

3  $S_{\text{BET}}$  normalized reaction rates ( $r_s$ , mol m<sup>-2</sup> s<sup>-1</sup>) was calculated by the  
4 following formula:

$$5 \quad r_s \text{ (mol m}^{-2} \text{ s}^{-1}) = \frac{C_{\text{in}} \times F}{m_{\text{cat}} \times S_{\text{BET}}} \times \ln(1 - X)$$

6 Where  $C_{\text{in}}$  refers to the NO concentration (ppm) in the inlet gas,  $F$  (mol s<sup>-1</sup>)  
7 is the flow rate,  $m_{\text{cat}}$  (g) is the mass of catalyst,  $S_{\text{BET}}$  (m<sup>2</sup> g<sup>-1</sup>) is the specific  
8 surface area calculated via BET method,  $X$  is the NO conversion.

9

### 10 **1.2 Calculation of turnover frequency (TOF)**

11 TOF value, representing the turnover conversion of single active sites per  
12 second, was calculated as following equation:

$$13 \quad \text{TOF} = \frac{v \times a}{V_m \times n_{\text{Cu-surf}}}$$

14 Where  $v$  is the flow rate of NO (m<sup>3</sup> s<sup>-1</sup>),  $V_m$  is the gas molar constant (m<sup>3</sup>  
15 mol<sup>-1</sup>),  $a$  is the NO conversion at certain temperature (%),  $n_{\text{Cu-surf}}$  is the  
16 mole number of active Cu atoms on the catalytic surface (mol). Notedly,  
17 the NO conversion was controlled below 20% within the whole  
18 temperature range to avoid the heat transfer effect (The corresponding data  
19 were displayed in Fig. S6 and Table S3).  $n_{\text{Cu-surf}}$  was calculated as following  
20 equation:

$$21 \quad n_{\text{Cu-surf}} = \frac{N_{\text{Cu-surf}}}{N_A}$$

1 Where  $N_{\text{Cu-surf}}$  is mole number of active Cu atoms on the catalytic surface  
2 and  $N_A$  is the Avogadro constant ( $6.02 \times 10^{23} \text{ mol}^{-1}$ ). Then  $N_{\text{Cu-surf}}$  was  
3 calculated as following equation:

$$4 \quad m_{\text{catal}} \times S_{\text{surf}} = S_{\text{Cu-surf}} + S_{\text{Ce-surf}} + S_{\text{O-surf}}$$
$$5 \quad = N_{\text{Cu-surf}} \times S_{\text{Cu-single}} + N_{\text{Ce-surf}} \times S_{\text{Ce-single}} + N_{\text{O-surf}} \times S_{\text{O-single}}$$

6 where  $m_{\text{catal}}$  (g) is the mass of catalyst,  $S_{\text{surf}}$  ( $\text{m}^2 \text{ g}^{-1}$ ) is the surface area of  
7 catalysts by BET method,  $S_{\text{Cu-single}}$  ( $\text{m}^2$ ),  $S_{\text{Ce-single}}$  ( $\text{m}^2$ ), and  $S_{\text{O-single}}$  ( $\text{m}^2$ ) are  
8 surface area of single atoms,  $r$  (m) is the value of atomic radii.

9 The atomic radii employed for Cu, Ce and O are shown as follows:

$$10 \quad r_{\text{Cu}} = 1.28 \times 10^{-10} \text{ m}, r_{\text{Ce}} = 1.83 \times 10^{-10} \text{ m}, r_{\text{O}} = 6.6 \times 10^{-10} \text{ m}$$

11 The relationship between  $N_{\text{Cu-surf}}$ ,  $N_{\text{Ce-surf}}$ ,  $N_{\text{O-surf}}$  was calculated based on  
12 XPS and relevant values were listed in Table S3.

### 13 **1.3 normalized reaction rate**

14 NO+CO reaction on the catalyst is recognized as a firstorder reaction with  
15 respect to NO. Assuming the diffusion to be limitation-free, the reaction  
16 rate ( $r$ ) can be calculated using NO conversion below 20% as

$$17 \quad r = - \frac{F \times \alpha}{S_{\text{Mn-surf}}}$$

18 where  $F$  is the flow of gaseous molecules ( $\text{mol s}^{-1}$ ),  $\alpha$  is the fractional  
19 conversion, and  $S_{\text{Mn-surf}}$  is the surface area of Mn atoms on the surfaces of  
20 catalysts ( $\text{m}^2$ ).  $N_{\text{Mn-surf}}$  and  $S_{\text{Mn-surf}}$  were estimated from the BET and XPS  
21 data as reported before<sup>1</sup>.

## 1 **1.4 Calculation of apparent activation energy (Ea)**

2 The Arrhenius formula ( $k=A \exp (Ea/RT)$ ) was applied to calculate the  
3 apparent activation energies (Ea) from the slope of the linear plot of  $\ln(R)$   
4 versus  $1000/T$ , and use it to analyze the difference in catalytic activity of  
5  $\text{CuO}_x/\text{CeO}_2\text{-X}$  catalysts. Ea and k were calculated by the following  
6 equation:

$$7 \quad k = -\frac{V}{w} \times \ln (1 - x)$$

$$8 \quad \ln k = -\frac{Ea}{RT} + \ln A$$

9 k is the reaction rate constant ( $\text{mol g}^{-1} \text{s}^{-1}$ ), V is the total gas flow ( $\text{mol}$   
10  $\text{s}^{-1}$ ), w is the mass of catalyst (g), x is the NO conversion (%), Ea is the  
11 apparent activation energy of catalyst ( $\text{kJ mol}^{-1}$ ), R is the gas constant  
12 ( $8.314 \text{ J mol}^{-1} \text{ K}^{-1}$ ), T is the reaction temperature (K) and A is the pre-  
13 exponential factor ( $\text{mol g}^{-1} \text{s}^{-1}$ ).

14

1 **2 Figure captions**

2 **Fig. S1** The N<sub>2</sub> selectivity (%) of (a) CuO<sub>x</sub>/CeO<sub>2</sub>-H, (b) CuO<sub>x</sub>/CeO<sub>2</sub>-T, (c)  
3 CuO<sub>x</sub>/CeO<sub>2</sub>-C, (d) CuO<sub>x</sub>/CeO<sub>2</sub>-F at different GHSV.

4 **Fig. S2** Resistance tests to O<sub>2</sub> + H<sub>2</sub>O + SO<sub>2</sub> over CuO<sub>x</sub>/CeO<sub>2</sub>-H catalysts at  
5 270 °C.

6 **Fig. S3** XRD patterns of CeO<sub>2</sub>-X.

7 **Fig. S4** SEM images of CuO<sub>x</sub>/CeO<sub>2</sub>-H(a), CuO<sub>x</sub>/CeO<sub>2</sub>-T(b), CuO<sub>x</sub>/CeO<sub>2</sub>-  
8 C(c) and CuO<sub>x</sub>/CeO<sub>2</sub>-F(d).

9 **Fig. S5** Raman spectra of CeO<sub>2</sub>-X.

10 **Fig. S6** N<sub>2</sub> adsorption/desorption isotherms (a) and pore size distribution  
11 (b) of CuO<sub>x</sub>/CeO<sub>2</sub>-X catalysts.

12 **Fig. S7** S<sub>BET</sub> normalized reaction rates of CuO<sub>x</sub>/CeO<sub>2</sub>-X catalysts for  
13 NO+CO reaction.

14 **Fig. S8** In situ FTIR spectra of NO adsorption on sulfurized CuO<sub>x</sub>/CeO<sub>2</sub>-  
15 X at 150 °C.

16 **Fig. S9** NO conversion in NO+CO reaction over the catalysts. Reaction  
17 conditions: [NO] = 350 ppm, [CO] = 700 ppm, GHSV=450,000 h<sup>-1</sup>.

18

1 **3 Table captions**

2 **Table S1** Catalytic performance of transition metal oxide Reported in the  
3 Literature.

4 **Table S2** The surface areas, pore diameter, pore volume and lattice.

5 **Table S3** TOF parameter information of  $\text{CuO}_x/\text{CeO}_2\text{-H}$ ,  $\text{CuO}_x/\text{CeO}_2\text{-T}$ ,  
6  $\text{CuO}_x/\text{CeO}_2\text{-C(c)}$  and  $\text{CuO}_x/\text{CeO}_2\text{-F}$  catalysts.

7

1 **Figure:**

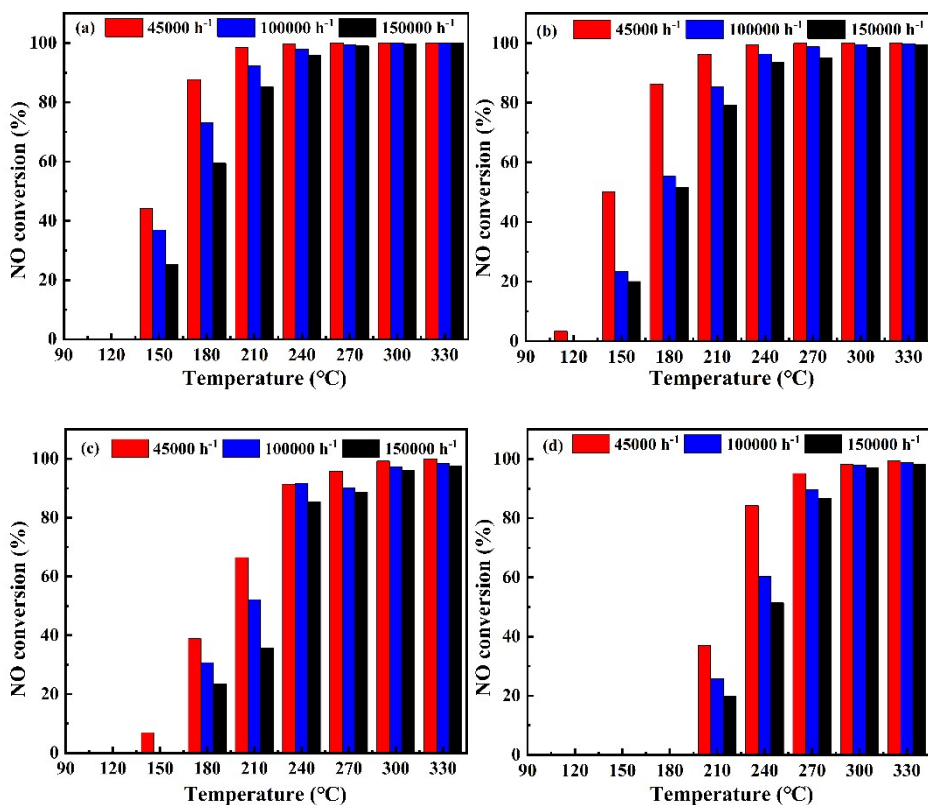

2

3

4 **Fig. S1** The N<sub>2</sub> selectivity (%) of (a) CuO<sub>x</sub>/CeO<sub>2</sub>-H, (b) CuO<sub>x</sub>/CeO<sub>2</sub>-T, (c)  
5 CuO<sub>x</sub>/CeO<sub>2</sub>-C, (d) CuO<sub>x</sub>/CeO<sub>2</sub>-F at different GHSV.

6

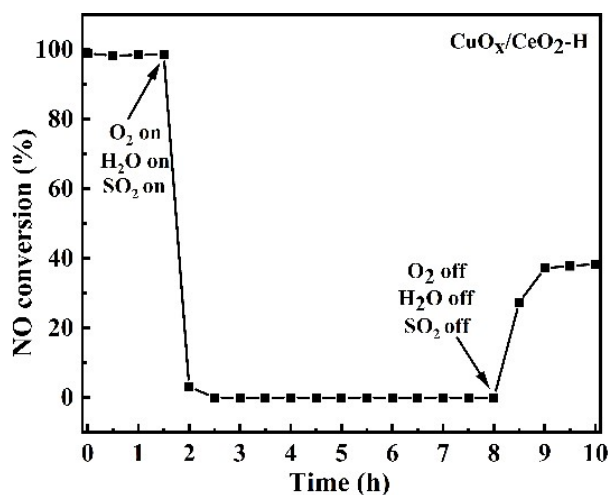

7

8 **Fig. S2** Resistance tests to O<sub>2</sub> + H<sub>2</sub>O + SO<sub>2</sub> over CuO<sub>x</sub>/CeO<sub>2</sub>-H catalysts at 270 °C.

9

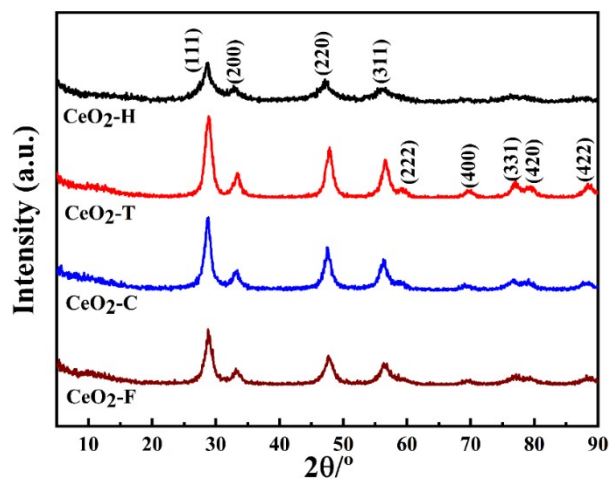

1

2

Fig S3 XRD patterns of CeO<sub>2</sub>-X supports.

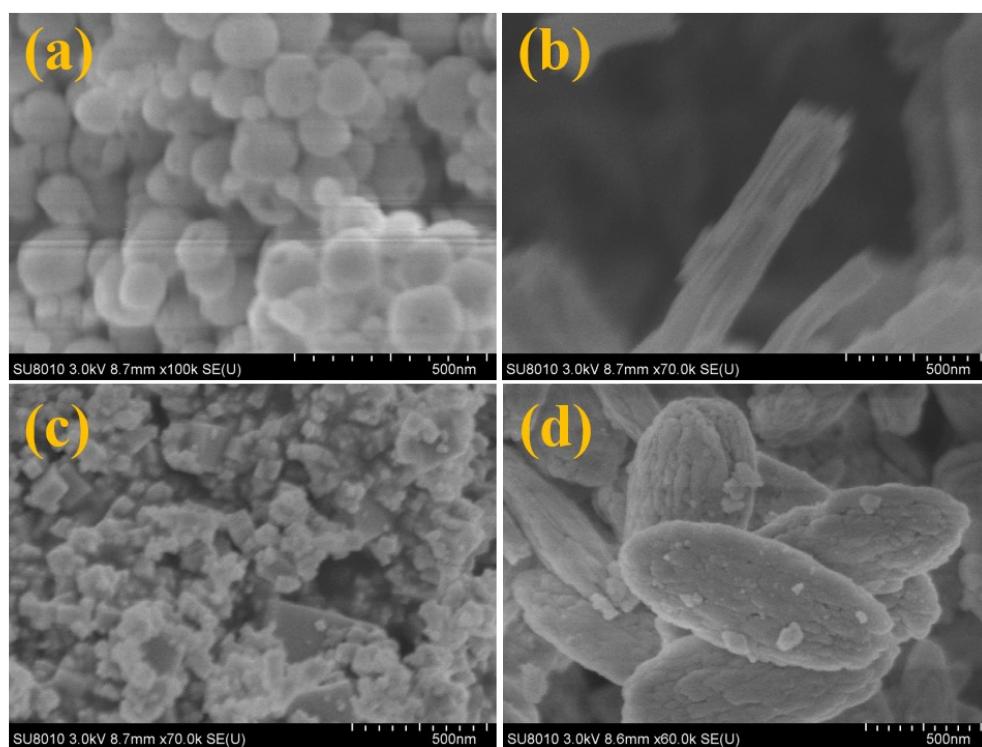

3

4

5

6

Fig. S4 SEM images of CuO<sub>x</sub>/CeO<sub>2</sub>-H(a), CuO<sub>x</sub>/CeO<sub>2</sub>-T(b), CuO<sub>x</sub>/CeO<sub>2</sub>-C(c), and CuO<sub>x</sub>/CeO<sub>2</sub>-F(d).



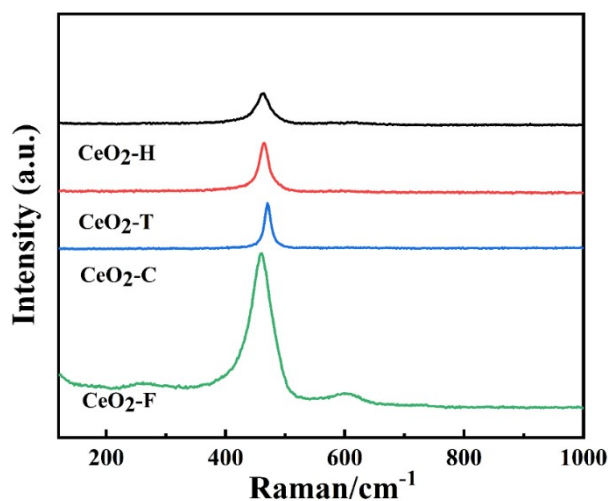

Fig. S5 Raman spectra of CeO<sub>2</sub>-X.

1  
2  
3

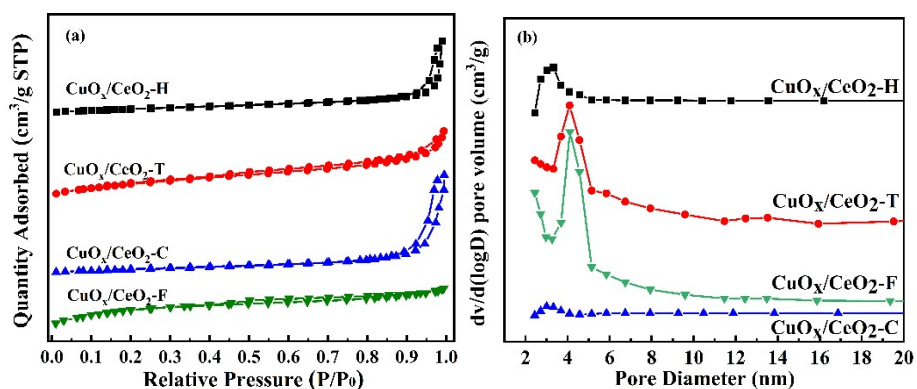

4  
5  
6  
7

Fig. S6 N<sub>2</sub> adsorption/desorption isotherms (a) and pore size distribution (b) of CuO<sub>x</sub>/CeO<sub>2</sub>-X catalysts.

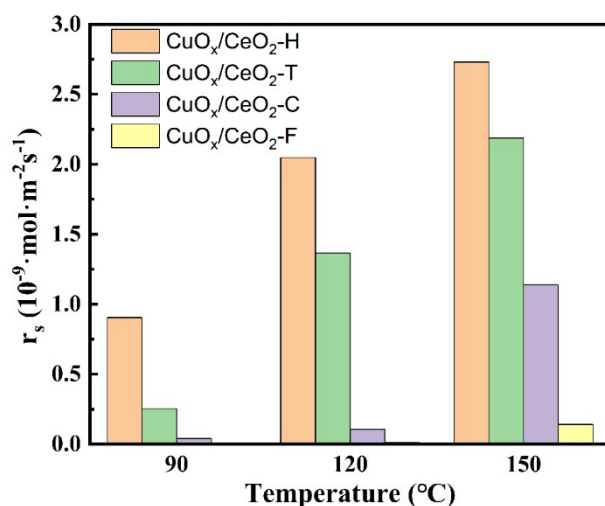

8  
9  
10  
11

Fig. S7 S<sub>BET</sub> normalized reaction rates of CuO<sub>x</sub>/CeO<sub>2</sub>-X catalysts for NO+CO reaction.

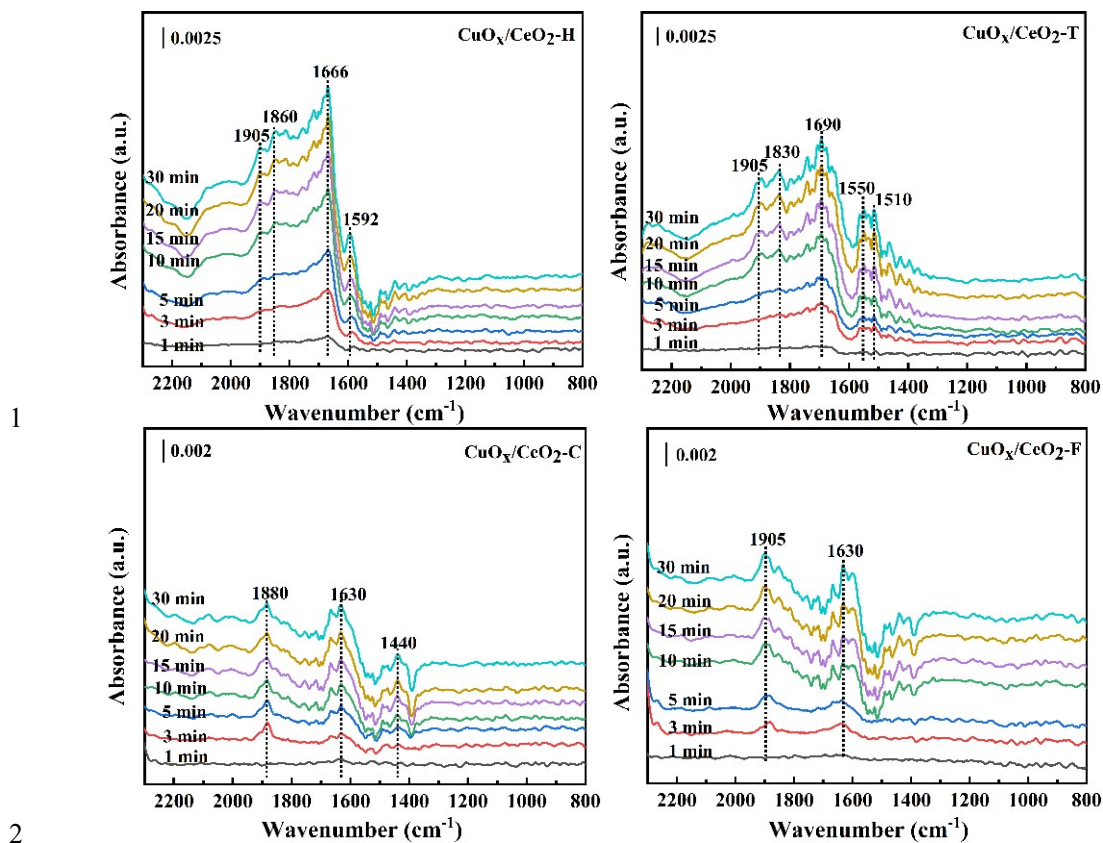

1  
2  
3 **Fig. S8** In situ FTIR spectra of NO adsorption on sulfurized  $\text{CuO}_x/\text{CeO}_2\text{-X}$  at 150 °C.

4 As shown in Fig. S8, the peaks located at 1860, 1905  $\text{cm}^{-1}$   
5 ( $\text{CuO}_x/\text{CeO}_2\text{-H}$ ), 1830, 1905  $\text{cm}^{-1}$  ( $\text{CuO}_x/\text{CeO}_2\text{-T}$ ), 1880  $\text{cm}^{-1}$  ( $\text{CuO}_x/\text{CeO}_2\text{-C}$ ) and 1905  $\text{cm}^{-1}$  ( $\text{CuO}_x/\text{CeO}_2\text{-F}$ ) are attributed to the gaseous NO/ weak  
6 adsorption of NO on  $\text{Cu}^+$  or  $\text{Cu}^{2+}$ . The bands located at 1666  $\text{cm}^{-1}$   
7 ( $\text{CuO}_x/\text{CeO}_2\text{-H}$ ) and 1690  $\text{cm}^{-1}$  ( $\text{CuO}_x/\text{CeO}_2\text{-T}$ ) correspond to bridged  
8 nitrate. The peaks located at 1630  $\text{cm}^{-1}$  ( $\text{CuO}_x/\text{CeO}_2\text{-C}$ ,  $\text{CuO}_x/\text{CeO}_2\text{-F}$ ) can  
9 be attributed to vibration modes of bridging bidentate nitrates<sup>2-7</sup>. The bands  
10 at 1592  $\text{cm}^{-1}$  ( $\text{CuO}_x/\text{CeO}_2\text{-H}$ ) and 1550  $\text{cm}^{-1}$  ( $\text{CuO}_x/\text{CeO}_2\text{-T}$ ) are coincided  
11 with the chelating bidentate nitrates. While two bands at 1510  $\text{cm}^{-1}$   
12 ( $\text{CuO}_x/\text{CeO}_2\text{-T}$ ) and 1440  $\text{cm}^{-1}$  ( $\text{CuO}_x/\text{CeO}_2\text{-C}$ ) correspond to monodentate  
13 nitrates and linear monodentate nitrites, respectively. From Fig. S6, it is  
14

1 discovered that the peak strength of  $\text{CuO}_x/\text{CeO}_2\text{-H}$  and  $\text{CuO}_x/\text{CeO}_2\text{-T}$  is  
2 slightly higher than that of  $\text{CuO}_x/\text{CeO}_2\text{-C}$  and  $\text{CuO}_x/\text{CeO}_2\text{-F}$ . The results  
3 indicate that  $\text{CuO}_x/\text{CeO}_2\text{-H}$  and  $\text{CuO}_x/\text{CeO}_2\text{-T}$  can effectively alleviate the  
4 competitive adsorption between NO and  $\text{SO}_2$ .

5

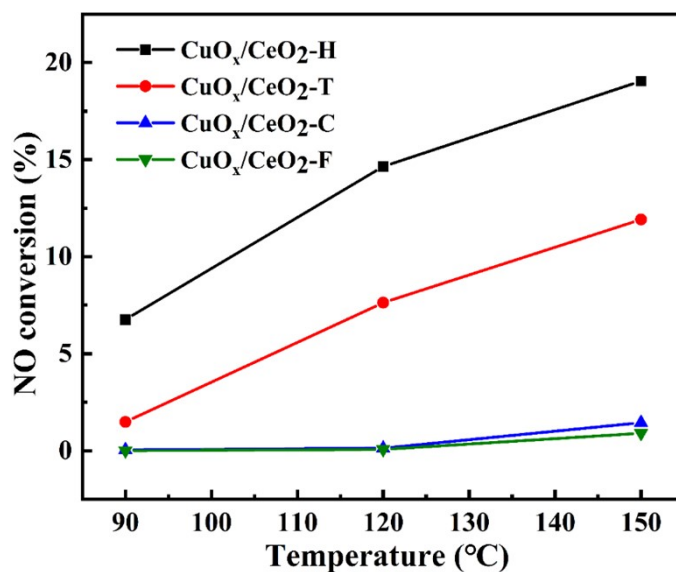

6

7 **Fig. S9** NO conversion in NO+CO reaction over the catalysts.

8

Reaction conditions:  $[\text{NO}] = 350 \text{ ppm}$ ,  $[\text{CO}] = 700 \text{ ppm}$ ,  $\text{GHSV} = 450,000 \text{ h}^{-1}$ .

9

1 **Table:**

2 **Table S1** Catalytic performance of transition metal oxide Reported in the Literature.

| Catalyst                              | Reaction conditions    |                                           |          |          |                 |                  | Ref.      |
|---------------------------------------|------------------------|-------------------------------------------|----------|----------|-----------------|------------------|-----------|
|                                       | Temperature range (°C) | GHSV or WHSV                              | NO (ppm) | CO (ppm) | T <sub>50</sub> | T <sub>max</sub> |           |
| MnO <sub>x</sub> /TiO <sub>2</sub>    | 200                    | 50,000h <sup>-1</sup>                     | 400      | 400      | \               | 200              | 8         |
| Cu-Ce/CNT                             | 140-260                | 12,600 h <sup>-1</sup>                    | 250      | 5000     | 170             | 240              | 9         |
| NiO-CeO <sub>2</sub>                  | 100-300                | 9000 ml g <sup>-1</sup> h <sup>-1</sup>   | 2.5%     | 5%       | 135             | 175              | 10        |
| Fe/TiO <sub>2</sub>                   | 150–500                | 75,000 h <sup>-1</sup>                    | 5000     | 5000     | 470             | 500              | 11        |
| CuO/ZrO <sub>2</sub>                  | 100-450                | 12,000 h <sup>-1</sup>                    | 5%       | 10%      | 250             | 450              | 12        |
| Cu/TiO <sub>2</sub> -CeO <sub>2</sub> | 150-400                | 24,000 ml g <sup>-1</sup> h <sup>-1</sup> | 5%       | 10%      | 220             | 310              | 13        |
| CuO/CeO <sub>2</sub>                  | 100-200                | 12,000 h <sup>-1</sup>                    | 5%       | 10%      | \               | 200              | 14        |
| Cu/CeO <sub>2</sub>                   | 100-325                | 15,000 ml g <sup>-1</sup> h <sup>-1</sup> | 5%       | 10%      | 135             | 300              | 15        |
| CuO/CeO <sub>2</sub>                  | 100-330                | 24,000 ml g <sup>-1</sup> h <sup>-1</sup> | 5%       | 10%      | 175             | 300              | 16        |
| CuO/CeO <sub>2</sub>                  | 100-400                | 12,000 ml g <sup>-1</sup> h <sup>-1</sup> | 5%       | 10%      | 150             | 400              | 17        |
| Cu/CeO <sub>2</sub>                   | 150-400                | 32,000 h <sup>-1</sup>                    | 5000     | 5000     | \               | 300              | 18        |
| CuO/CeO <sub>2</sub>                  | 50-300                 | 36,000 ml g <sup>-1</sup> h <sup>-1</sup> | 1 vol%   | 1 vol%   | 105             | 200              | 19        |
| CuO <sub>x</sub> /CeO <sub>2</sub> -H | 90-330                 | 45,000 h <sup>-1</sup>                    | 350      | 700      | 102             | 270              | This work |

3 GHSV means gaseous hourly space velocity (h<sup>-1</sup>)

4 WHSV means weight hourly space velocity (ml g<sup>-1</sup> h<sup>-1</sup>)

5 T<sub>50</sub> represents the temperature when the efficiency is 50%

6 T<sub>max</sub> represents the temperature when the efficiency is maximum

7

8

9

10

11

1

2 **Table S2** The surface areas, pore diameter, pore volume and lattice parameter of  
 3 supports.

| Catalysts           | $S_{\text{BET}}^{\text{a}}$<br>( $\text{m}^2/\text{g}$ ) | Pore diameter <sup>b</sup><br>(nm) | Pore volume <sup>c</sup><br>( $\text{cm}^3/\text{g}$ ) | Lattice<br>parameter ( $\text{\AA}$ ) |
|---------------------|----------------------------------------------------------|------------------------------------|--------------------------------------------------------|---------------------------------------|
| CeO <sub>2</sub> -H | 29                                                       | 11                                 | 0.1                                                    | 5.46                                  |
| CeO <sub>2</sub> -T | 85                                                       | 7                                  | 0.1                                                    | 5.37                                  |
| CeO <sub>2</sub> -C | 20                                                       | 26                                 | 0.1                                                    | 5.38                                  |
| CeO <sub>2</sub> -F | 125                                                      | 4                                  | 0.1                                                    | 5.41                                  |

4 <sup>a</sup> Calculated by BET method <sup>b,c</sup> Calculated by BJH formula

5

6 **Table S3** TOF parameter information of CuO<sub>x</sub>/CeO<sub>2</sub>-X catalysts.

| Catalysts                             | Mass (g) | $S_{\text{BET}}$ ( $\text{m}^2 \cdot \text{g}^{-1}$ ) | Normalized ratio of each element |      |       |
|---------------------------------------|----------|-------------------------------------------------------|----------------------------------|------|-------|
|                                       |          |                                                       | Cu                               | Ce   | O     |
| CuO <sub>x</sub> /CeO <sub>2</sub> -H | 0.04     | 112                                                   | 1.00                             | 2.84 | 10.27 |
| CuO <sub>x</sub> /CeO <sub>2</sub> -T | 0.04     | 84                                                    | 1.00                             | 3.50 | 11.37 |
| CuO <sub>x</sub> /CeO <sub>2</sub> -C | 0.04     | 19                                                    | 1.00                             | 1.74 | 6.49  |
| CuO <sub>x</sub> /CeO <sub>2</sub> -F | 0.04     | 92                                                    | 1.00                             | 2.66 | 10.65 |

7

## 1 References

- 2 1. C. Huang, Y. Zhu, X. Wang, X. Liu, J. Wang and T. Zhang, *Journal of Catalysis*, 2017, 347, 9-  
3 20.
- 4 2. X. Cheng, X. Zhang, D. Su, Z. Wang, J. Chang and C. Ma, *Applied Catalysis B: Environmental*,  
5 2018, 239, 485-501.
- 6 3. X. Yao, Y. Xiong, W. Zou, L. Zhang, S. Wu, X. Dong, F. Gao, Y. Deng, C. Tang, Z. Chen, L.  
7 Dong and Y. Chen, *Applied Catalysis B: Environmental*, 2014, 144, 152-165.
- 8 4. X. Yao, F. Gao, Q. Yu, L. Qi, C. Tang, L. Dong and Y. Chen, *Catalysis Science & Technology*,  
9 2013, 3.
- 10 5. J. Liu, X. Li, Q. Zhao, J. Ke, H. Xiao, X. Lv, S. Liu, M. Tadé and S. Wang, *Applied Catalysis*  
11 *B: Environmental*, 2017, 200, 297-308.
- 12 6. L. Li, L. Zhang, K. Ma, W. Zou, Y. Cao, Y. Xiong, C. Tang and L. Dong, *Applied Catalysis B:*  
13 *Environmental*, 2017, 207, 366-375.
- 14 7. X. Yao, R. Zhao, L. Chen, J. Du, C. Tao, F. Yang and L. Dong, *Applied Catalysis B:*  
15 *Environmental*, 2017, 208, 82-93.
- 16 8. T. Boningari, S. M. Pavani, P. R. Ettireddy, S. S. C. Chuang and P. G. Smirniotis, *Molecular*  
17 *Catalysis*, 2018, 451, 33-42.
- 18 9. Z. Gholami and G. Luo, *Industrial & Engineering Chemistry Research*, 2018, 57, 8871-8883.
- 19 10. C. Tang, B. Sun, J. Sun, X. Hong, Y. Deng, F. Gao and L. Dong, *Catalysis Today*, 2017, 281,  
20 575-582.
- 21 11. C. A. Sierra-Pereira and E. A. Urquieta-González, *Fuel*, 2014, 118, 137-147.
- 22 12. Q. Yu, X. Yao, H. Zhang, F. Gao and L. Dong, *Applied Catalysis A: General*, 2012, 423-424,  
23 42-51.
- 24 13. C. Deng, B. Li, L. Dong, F. Zhang, M. Fan, G. Jin, J. Gao, L. Gao, F. Zhang and X. Zhou,  
25 *Physical Chemistry Chemical Physics : PCCP*, 2015, 17.
- 26 14. G. Xianrui, L. Hao, L. Lichen, T. Changjin, G. Fei and D. Lin, *Journal of Rare Earths*, 2014,  
27 32, 139-145.
- 28 15. L. Liu, Z. Yao, Y. Deng, F. Gao, B. Liu and L. Dong, *ChemCatChem*, 2011, 3, 978-989.
- 29 16. X. Yao, Q. Yu, Z. Ji, Y. Lv, Y. Cao, C. Tang, F. Gao, L. Dong and Y. Chen, *Applied Catalysis*  
30 *B: Environmental*, 2013, 130-131, 293-304.
- 31 17. L. Liu, J. Cai, L. Qi, Q. Yu, K. Sun, B. Liu, F. Gao, L. Dong and Y. Chen, *Journal of Molecular*  
32 *Catalysis A: Chemical*, 2010, 327, 1-11.
- 33 18. J. Chen, Y. Zhan, J. Zhu, C. Chen, X. Lin and Q. Zheng, *Applied Catalysis A: General*, 2010,  
34 377, 121-127.
- 35 19. Q. Shi, Y. Wang, S. Guo, Z.-K. Han, N. Ta, G. Li, Baiker and Alfons, *Catalysis Science &*  
36 *Technology*, 2021, 11, 6543-6552.
